# Supplementary material
Source: HighWire-hosted journal article supplement (https://www.ajevonline.org/highwire/filestream/9342/field_highwire_adjunct_files/0/13_09-134_614p536_SuppTabs.pdf)
Supplement: 13_09-134_614p536_SuppTabs.pdf [file 13_09-134_614p536_SuppTabs.pdf]

Supplemental Data for:

Revilla, E., D. Carrasco, A. Benito, and R. Arroyo-García. 2010. Anthocyanin composition of several wild grape accessions. *Am. J. Enol. Vitic.* 61:536-543. doi: 10.5344/ajev.2010.09134.

**Supplemental Table 1** Weight of 50 grapes and total sugar, pH, and acidity of must in samples collected in 2006, 2007, and 2008.

| Accession | Weight of 50 grapes (g) <sup>a</sup> |       |       | Must total sugar (Brix) <sup>a</sup> |      |      | Must pH <sup>a</sup> |      |      | Must total acidity (g/L) <sup>a</sup> |      |      |
|-----------|--------------------------------------|-------|-------|--------------------------------------|------|------|----------------------|------|------|---------------------------------------|------|------|
|           | 2006                                 | 2007  | 2008  | 2006                                 | 2007 | 2008 | 2006                 | 2007 | 2008 | 2006                                  | 2007 | 2008 |
| BA-1.1    | 21.20                                | 21.27 | 19.54 | 23.2                                 | 22.0 | 25.4 | 3.14                 | 2.77 | 2.73 | 8.0                                   | 11.6 | 19.1 |
| CA-4.1    | 18.30                                | 24.03 | 26.36 | 24.2                                 | 19.0 | 23.8 | 3.08                 | 2.63 | 2.83 | 7.2                                   | 17.1 | 15.4 |
| CA-6.1    | 44.10                                | 33.32 | 32.31 | 24.8                                 | 21.0 | 27.4 | 3.03                 | 2.75 | 2.98 | 7.9                                   | 23.3 | 16.7 |
| CA-10.3   | ns                                   | 29.17 | 34.09 | ns                                   | 24.2 | 25.3 | ns                   | 3.19 | 3.21 | ns                                    | 5.9  | 7.9  |
| CA-12.5   | 9.70                                 | ns    | 17.80 | nd                                   | ns   | 27.1 | nd                   | ns   | 2.60 | nd                                    | ns   | 23.1 |
| CO-7.6    | 24.20                                | ns    | 31.36 | 27.6                                 | ns   | 26.4 | 3.38                 | ns   | 2.96 | 5.2                                   | ns   | 11.8 |
| CR-1.3    | 28.70                                | 25.20 | 25.68 | 26.2                                 | 24.8 | 27.0 | 3.66                 | 2.98 | 3.05 | 7.0                                   | 10.1 | 14.6 |
| FR-2.1    | 15.50                                | 17.53 | 35.96 | 25.2                                 | 22.8 | 24.9 | 3.01                 | 2.50 | 3.20 | 10.1                                  | 26.6 | 13.1 |
| H-2.7     | 38.90                                | 19.23 | 17.95 | 23.8                                 | 17.2 | 29.5 | 3.17                 | 2.66 | 2.88 | 6.4                                   | 19.7 | 19.1 |
| H-4.1     | 20.70                                | 21.98 | 15.16 | 29.2                                 | 18.8 | 28.7 | 3.38                 | 2.59 | 2.58 | 6.9                                   | 23.1 | 37.5 |
| H-6.1     | 10.50                                | ns    | 22.60 | nd                                   | ns   | 25.1 | nd                   | ns   | 2.69 | nd                                    | ns   | 20.4 |
| LE-1.1    | ns                                   | 23.54 | 21.46 | ns                                   | 17.2 | 21.5 | ns                   | 2.64 | 3.01 | ns                                    | 27.0 | 14.4 |
| LE-1.2    | 24.10                                | 22.08 | 20.12 | 22.8                                 | 15.4 | 22.2 | 3.77                 | 2.72 | 3.04 | 5.3                                   | 24.2 | 14.6 |
| LE-1.3    | ns                                   | 22.97 | 25.80 | ns                                   | 18.8 | 20.9 | ns                   | 2.68 | 3.00 | ns                                    | 24.4 | 15.3 |
| LE-1.6    | ns                                   | 25.18 | 26.63 | ns                                   | 17.4 | 20.3 | ns                   | 2.65 | 3.04 | ns                                    | 26.3 | 17.1 |
| MA-3.2    | 43.80                                | 52.20 | 70.33 | 18.2                                 | 26.8 | 27.9 | 2.76                 | 2.92 | 3.14 | 19.7                                  | 11.3 | 14.0 |
| MA-3.9    | 56.00                                | 55.17 | 57.14 | 27.6                                 | 25.8 | 26.5 | 3.64                 | 3.01 | 3.03 | 3.8                                   | 9.0  | 11.4 |
| NA-1.4    | 16.50                                | ns    | 13.64 | 25.6                                 | ns   | 24.2 | 2.85                 | ns   | 2.60 | 13.8                                  | ns   | 27.7 |
| S-1.9     | 23.00                                | ns    | 23.14 | 22.6                                 | ns   | 24.9 | 2.92                 | ns   | 2.82 | 10.8                                  | ns   | 20.9 |
| SE-3.2    | 22.40                                | 19.07 | 24.22 | 30.8                                 | 25.6 | 27.0 | 3.45                 | 3.16 | 2.85 | 7.1                                   | 9.9  | 14.1 |
| SS-2.3    | 20.40                                | 18.70 | 23.71 | 20.8                                 | 20.2 | 23.8 | 2.90                 | 2.93 | 3.22 | 13.8                                  | 15.1 | 10.0 |

<sup>a</sup>ns: not sampled; nd: not determined (because of overripe samples).

**Supplemental Table 2** Results of two-way analysis of variance for variables considered for describing the anthocyanin fingerprint of grapes.

| Anthocyanin | Accession |         | Year    |         |
|-------------|-----------|---------|---------|---------|
|             | F ratio   | p value | F ratio | p value |
| DpGl        | 6.24      | 0.0000  | 7.28    | 0.0026  |
| CyGl        | 6.14      | 0.0000  | 8.73    | 0.0010  |
| PtGl        | 8.87      | 0.0000  | 5.09    | 0.0122  |
| PnGl        | 13.64     | 0.0000  | 2.30    | 0.1170  |
| MvGl        | 4.85      | 0.0000  | 4.80    | 0.0153  |
| DfGlAc      | 24.52     | 0.0000  | 1.51    | 0.2364  |
| CyGlAc      | 20.53     | 0.0000  | 1.50    | 0.2392  |
| PtGlAc      | 21.33     | 0.0000  | 0.48    | 0.6259  |
| DfGlCm      | 30.21     | 0.0000  | 3.02    | 0.0633  |
| PnGlAc      | 27.78     | 0.0000  | 9.38    | 0.0007  |
| MvGlAc      | 29.65     | 0.0000  | 18.57   | 0.0000  |
| MvGlCf      | 3.05      | 0.0026  | 2.14    | 0.1352  |
| PtGlCm      | 36.53     | 0.0000  | 4.60    | 0.0178  |
| PnGlCm      | 8.61      | 0.0000  | 7.23    | 0.0026  |
| MvGlCm      | 18.52     | 0.0000  | 18.80   | 0.0000  |

**Supplemental Table 3** Factor contribution (%) to variance of variables considered for describing the anthocyanin fingerprint of wild grapes.

| Anthocyanin | Accession (%) | Year (%) |
|-------------|---------------|----------|
| DpGl        | 58.52         | 41.48    |
| CyGl        | 54.26         | 45.74    |
| PtGl        | 70.51         | 29.49    |
| PnGl        | 81.87         | 18.13    |
| MvGl        | 53.35         | 46.65    |
| DfGlAc      | 90.28         | 9.72     |
| CyGlAc      | 88.75         | 11.25    |
| PtGlAc      | 89.33         | 10.67    |
| DfGlCm      | 91.48         | 8.52     |
| PnGlAc      | 87.33         | 12.67    |
| MvGlAc      | 83.86         | 16.14    |
| MvGlCf      | 40.78         | 59.22    |
| PtGlCm      | 92.16         | 7.84     |
| PnGlCm      | 67.97         | 32.03    |
| MvGlCm      | 76.08         | 23.92    |
